# Supplementary material for: Numerical Estimation of SAR and Temperature Distributions inside Differently Shaped Female Breast Tumors during Radio-Frequency Ablation
Source: MDPI journal article supplement (doi:10.3390/ma16010223), 2022-12-26
Supplement: s1 [file s1]

# Numerical Estimation of SAR and Temperature Distributions inside Differently Shaped Female Breast Tumors during Radio-Frequency Ablation

Arkadiusz Miaskowski <sup>1,\*</sup> and Piotr Gas <sup>2,\*</sup>

<sup>1</sup> Department of Applied Mathematics and Computer Sciences, Faculty of Production Engineering, University of Life Sciences in Lublin, Akademicka 13 Street, 20-950 Lublin, Poland

<sup>2</sup> Department of Electrical and Power Engineering, Faculty of Electrical Engineering, Automatics, Computer Science and Biomedical Engineering, AGH University of Science and Technology, Mickiewicza 30 Avenue, 30-059 Krakow, Poland

\* Correspondence: arek.miaskowski@up.lublin.pl (A.M.); piotr.gas@agh.edu.pl (P.G.)

## 1. Numerical Modelling

**Table S1.** The quasi-static approximation criteria for the Electro-Quasi Static Solver (EQS) for  $f = 100$  kHz.

| Material                    | Epsilon            | Mu | SigmaE   | QS Approx. Quality      | Static Magnetic Field | SigmaE/w*Epsilon |
|-----------------------------|--------------------|----|----------|-------------------------|-----------------------|------------------|
| Background (Air)            | 1                  | 1  | 0        | $1.7462 \times 10^{-6}$ | 0                     | 0                |
| Fatty-1                     | 70.6               | 1  | 0.025    | 0.0001233               | 0.0078625             | 63.766           |
| Fatty-2                     | 70.6               | 1  | 0.025    | 0.0001233               | 0.0078625             | 63.766           |
| Fatty-3                     | 70.6               | 1  | 0.025    | 0.0001233               | 0.0078625             | 63.766           |
| Fibroconnective/glandular-1 | $3.3 \times 10^3$  | 1  | 0.537    | 0.0057646               | 0.16855               | 29.239           |
| Fibroconnective/glandular-2 | $3.3 \times 10^3$  | 1  | 0.537    | 0.0057646               | 0.16855               | 29.239           |
| Fibroconnective/glandular-3 | $3.3 \times 10^3$  | 1  | 0.537    | 0.0057646               | 0.16855               | 29.239           |
| Muscle                      | $8.09 \times 10^3$ | 1  | 0.362    | 0.014126                | 0.11358               | 8.0407           |
| Skin                        | $1.12 \times 10^3$ | 1  | 0.000451 | 0.0019544               | 0.00014165            | 0.072479         |
| Transitional                | 101                | 1  | 0.0434   | 0.00017723              | 0.013623              | 76.867           |
| Tumor                       | $8.09 \times 10^3$ | 1  | 0.362    | 0.014126                | 0.11358               | 8.0407           |
| Dielectric 1 (Applicator)   | 2.25               | 1  | 0.0005   | $3.929\text{e-}06$      | 0.00015694            | 39.945           |
| Dielectric 2 (Applicator)   | 2.25               | 1  | 0.0005   | $3.929\text{e-}06$      | 0.00015694            | 39.945           |
| Catheter (Applicator)       | 2.25               | 1  | 0.0005   | $3.929\text{e-}06$      | 0.00015694            | 39.945           |

The column QS Approx. Quality and Static Magnetic Field refers to quasi-static conditions. The column SigmaE/w\*Epsilon indicates whether the displacement current ( $\ll 1$ ) or the ohmic current dominates ( $\gg 1$ ).
